1 ***On the cause and consequences of coinfection:***

2 **A general mechanistic framework of within-host parasite competition**

3  
4 Ashwini Ramesh<sup>1,2\*</sup> and Spencer R Hall<sup>2</sup>

5 <sup>1</sup>Department of Integrative Biology; Department of Molecular & Microbial Genetics, Michigan State  
6 University, East Lansing, USA – 48823

7 <sup>2</sup>Department of Biology, Indiana University, Bloomington, Indiana, USA – 47405

8  
9 \*Corresponding author email: [rameshas@msu.edu](mailto:rameshas@msu.edu)

10 Co-author email: [sprhall@iu.edu](mailto:sprhall@iu.edu)

11  
12 **Competing Interest:** Authors declare no competing interests

13 **Short title:** On the cause and consequences of coinfection

14 **Key words:** competition, coinfection, priority effects, founder control, nutrient supply, host health,  
15 nutritional immunity, infectious disease

16 **Type:** Synthesis; review; framework; mathematical modelling; infectious disease; public health

17 **Number of words in abstract:** 200

18 **Number of words in main text:** 7154

19 **Number of references:** 54

20 **Number of figures, and tables:** 9 figures and 1 table

21  
22  
23  
24  
25  
26  
**NOTE:** This preprint reports new research that has not been certified by peer review and should not be used to guide clinical practice.

27

28 **ABSTRACT**

29           Coinfections pose serious threats to health and exacerbate parasite burden. If coinfection is  
30 detrimental, then what within-host factors facilitate it? Equally importantly, what hinders it, say via  
31 exclusion or priority effects? Such interactions ought to stem from their within-host environment ('niche'),  
32 i.e., resources that parasites steal from hosts and immune cells that kill them. Yet, despite two decades of  
33 empirical focus on within-host infection dynamics, we lack a mechanistic framework to understand why  
34 coinfection arises and the diverse range of its' consequences. Hence, we construct a trait-based niche  
35 framework, one that illustrates general principles that govern parasite competition for a resource and  
36 apparent competition for immune cells. We show that coinfection requires a competition-resistance tradeoff  
37 and that each parasite most impacts the niche factor to which it is most sensitive. These predictions then  
38 provide mechanistic interpretation for infection outcomes seen in a variety of extant experiments: Why does  
39 nutrient supplementation shift relative frequencies of coinfecting parasites? When and how does sequence  
40 of parasite invasion allow only early invading parasites to win? How does intrinsic variation in immune  
41 response shape coinfection burden? Together, this mechanistic framework of parasite competition offers  
42 new perspectives to better predict within-host infection dynamics and improve individual health.

43

44

## 45 INTRODUCTION

46 Coinfections pose a serious threat to health both at the individual and population scale for hosts.  
47 Broadly, coinfection is the successful concurrent infestation of a host with two or more parasite species.  
48 Coinfection worsens human health (76% of 2000 publications in a meta-analysis) and exacerbates infection  
49 burden (57%; Griffiths *et al* 2011). For instance, bacterial co-infections cause two-fold increase in mortality  
50 in COVID patients (Shah *et al* 2023). Similarly, coinfecting helminth species increased the odds of anaemia  
51 five-to-eight-fold among children (Ezeamama *et al* 2005). Coinfection at the individual scale can also  
52 influence population-scale disease dynamics (Ezenwa & Jolles 2011). Populations having higher frequency  
53 of coinfection experience larger epidemics than those with epidemics of one parasite (Susi *et al* 2015). Yet,  
54 despite virulent costs, coinfections are pervasive amongst hosts, including humans, wildlife, and livestock  
55 / agriculture (Vogels *et al* 2018; Ezenwa *et al* 2010; Halliday, Penczykowski *et al* 2020). Therefore, we  
56 need to better understand why and how parasites coinfect their hosts.

57 Nonetheless, coinfection represents just one of numerous outcomes of concurrent pathogenesis. That  
58 fact poses fundamental questions about coinfection. First, if coinfection is indeed detrimental, then what  
59 within-host factors facilitate it? Equally importantly, what prevents it? Within-host parasite competition  
60 can lead to coinfection (*i.e.*, within-host parasite coexistence), singly infection (through exclusion or  
61 priority effects), or clearance (no infection) from hosts (Vogel *et al* 2018). Yet, we lack theoretical  
62 predictions to elucidate those outcomes of competition. For instance, irrespective of timing, sequential  
63 exposure to some parasites always lead to coinfection, yet to others, only early infecting parasites prevail  
64 (Fig. 1A; Clay *et al* 2019; Devevey *et al* 2015). Second, when they coinfect why do some parasites become  
65 more abundant than others in relative and absolute senses? For instance, nutrient supply or resources can  
66 shift this ‘community structure’ of parasites within hosts favouring one parasite over the other (Fig. 1B;  
67 Fellous & Koella 2009, Budischak *et al* 2015). Finally, not all coinfecting hosts are equal. Some hosts  
68 present higher coinfection burden than others, hinting at variation in immunological resistance (Fig. 1C;  
69 Fuess *et al* 2021, Halliday *et al* 2018). How does such variation govern coinfection burden? Presently, these  
70 disparate bits about coinfection remain unconnected, lacking a synthetic glue. Here, we seek to catalyse  
71 creation of a framework linking genesis of coinfection to its consequences (Lively *et al* 2014; Restif &  
72 Graham 2015).

73 A mechanistic, within-host framework of parasite competition provides a start. To illustrate, we  
 74 develop and evaluate within-host models of coinfection, synthesizing insights through an ecological lens  
 75 (following Ramesh & Hall 2023). Broadly, coinfection (*i.e.*, within-host coexistence of parasites) occurs  
 76 when each parasite species competes more strongly with themselves (intraspecifically) than with each other  
 77 (interspecifically; Fig. 1D). Those competitive differences could be measured phenomenologically. Even  
 78 better, they can be quantified from trait-based niche models for parasites competing within hosts (Graham  
 79 *et al* 2008, Cressler *et al* 2014). In such models, parasites interact within host ‘ecosystems’ for shared  
 80 resources while facing attack by energetically costly immune cells. Simple ecological rules, then, govern  
 81 within-host parasite competition. To illustrate, we first borrow from old and new niche models to outline  
 82 how shared energy (resources) and/or immune cells could govern divergent coinfection outcomes (Fig. 2).  
 83 Second, using a case study of a two parasite – immune cells – energy model (2PIE) niche model, we link  
 84 outcomes of infection to competitive abilities, nullclines (niches), feedback, and key traits (Figs. 3-7; Table  
 85 S1,2). Third, our approach scripts how to link *a priori* predictions to interpretation of experimental  
 86 outcomes using these types of models (Fig. 8-9). Finally, we offer suggestions for future theory and  
 87 experiments (Fig. 10, Table 1). Taken together, we lay a general mechanistic framework to understand  
 88 coinfection using within-host niche-based competition model.

89

## 90 Section I: A phenomenological approach to coinfection

91 To visualize these interactions, we label the direct effect of species *j* on growth rate of species *i*,  
 92 yielding (hereafter) interspecific *positive effects* (black arrow) and *negative effects* (red arrow) and  
 93 intraspecific *self-limitation* (red curve; Fig. 1,2). Then, we can write the two-species Lotka–Volterra  
 94 competition model in terms of intra ( $a_{ii}$ )- and inter ( $a_{ij}$ )-specific per capita competition coefficients:

$$95 \quad \underbrace{\frac{1}{P_i} \cdot \frac{dP_i}{dt}}_{\text{per capita growth rate}} = \underbrace{r_i}_{\text{intrinsic growth rate}} \left( 1 - \underbrace{a_{ii}P_i}_{\text{effect of intrasp competition}} - \underbrace{a_{ij}P_j}_{\text{effect of intersp competition}} \right) \quad (1)$$

96 where  $P_i$  is the density of parasite species *i*, and  $r_i$  is its intrinsic (maximum per capita) growth rate. This  
 97 model assumes that per capita growth rates (fitness) decrease linearly with density of each species with  
 98 slopes  $a_{ii}$  and  $a_{ij}$  (Table 1A). Successful coinfection satisfies two conditions. First, each single-species

99 ('boundary') carrying capacity ( $1/a_{ii}$ ) must be invulnerable by the other parasite when rare. That condition is  
100 met when each species reduces its own growth rate more than that of its competitor (i.e.,  $a_{11} > a_{21}$  and  $a_{22} >$   
101  $a_{12}$ ). Second, joint intraspecific ( $a_{11} a_{22}$ ) must exceed joint interspecific competition ( $a_{12} a_{21}$ ). When both  
102 are met, the feasible coexistence ('interior') equilibrium is stable with negative feedback (Table 1A).

103 Coinfection is hindered in one of two ways. First, strong positive feedback at the interior generates  
104 priority effects when joint inter- exceeds intra-specific competition ( $a_{12} a_{21} > a_{11} a_{22}$ ). Priority effects also  
105 require mutually invulnerable boundary equilibria and a feasible interior (which are both met when  $a_{11} < a_{21}$   
106 and  $a_{22} < a_{12}$ ). Here, high enough initial density of parasites determines the winner. Second, competitive  
107 exclusion arises with asymmetric competition. Specifically, if  $P_2$  cannot invade  $P_1$ 's boundary ( $a_{11} < a_{21}$ )  
108 but  $P_1$  can invade  $P_2$ 's boundary ( $a_{22} > a_{12}$ ), then  $P_1$  excludes  $P_2$ . Conversely,  $P_2$  excludes  $P_1$  when  $a_{11} > a_{21}$   
109 but  $a_{22} < a_{12}$ . Hence, mutually or asymmetrically strong interspecific competition can hinder coinfection.

110 Empirically, estimates of competition coefficients can come from densities and growth rates of  
111 parasites. Various methods exist, including a response surface design. In the context of macroparasites, this  
112 design involves growing species either alone or at the lowest densities that lead to infection. It also involves  
113 growing species with increasing density of intra- and inter-specific competitors. Through this design,  $a_{ii}$   
114 and  $a_{ij}$  can be estimated, then used to predict if species can successfully infect when rare (Freckleton &  
115 Watkinson 2000; reviewed in Hart *et al* 2018; see Table 1A). However, this approach remains  
116 phenomenological, measuring coefficients only in a specific environment. That context-dependence limits  
117 predictions of infection outcomes across gradients of traits, nutrient supply, or in allocation to immunity.  
118 Instead, predictions in these other contexts require a mechanistic framework of competition between  
119 parasites involving host immunity and/or host resources.

120

## 121 **Section II: Within-host feedbacks driving divergent infection outcomes**

122 To move toward creation of such a framework, we outline six models of within-host competition  
123 between parasites involving immunity, resources, and/or direct interference (Fig. 2). All potentially contain  
124 mechanisms for coinfection, single infection due to exclusion or priority effects (aka, alternative states or  
125 founder control), and no infection. Although details can vary, such divergent outcomes in these models  
126 follow general principles of species competition as outlined above. In essence, coinfection occurs when

127 strong intraspecific competition (mediated directly or looped indirectly via ‘niche’ factors such as resources  
128 or immune cells) outweighs strong interspecific competition. Stronger intraspecific competition leads to  
129 net negative feedback on the feasible (‘interior’) stable equilibrium, facilitating coinfection.

130

131 *Two parasite – shared energy (2PE) or – shared immune cells (2PI)*

132 Parasite species that share a resource (energy) or suffer attack from a shared immune system engage  
133 in exploitative or apparent competition, respectively (Fig. 2A,B). In exploitative competition (Fig. 2A), a  
134 parasite that can survive at the lower equilibrium energy (resource) level ( $E^*$ ) can outcompete the other. For  
135 instance, among two clones of a rodent malaria (*P. chabaudi*), the superior competitor for red blood cells  
136 (RBC) always excludes the inferior clone (De Roode *et al* 2005). Competition for a single, shared resource  
137 can lead to a competitive hierarchy among multiple parasite species. For instance, in a malarial-hookworm  
138 system, one Plasmodium species (*P. falciparum*) outcompetes hookworms which themselves outcompete  
139 another Plasmodium (*P. vivax*) for red blood cells (Budischak *et al* 2018). Analogous rules can characterize  
140 host systems with a shared immune system (Fig. 2B). In models, when two exponentially growing parasites  
141 share immune cells, the species that can withstand highest density of immune cells (*i.e.*, highest  $I^*$ ) wins  
142 via apparent competition (Fenton & Perkins 2010). In a possibly analogous experiment, immune-mediated  
143 interactions led to competitive suppression of an avirulent malarial clone, allowing the virulent clone to  
144 dominate (Råberg *et al* 2006). Therefore, exploitative competition for a single resource or apparent  
145 competition involving shared immune cells can lead to competitive exclusion alone.

146 Three aspects of within-host parasite biology can introduce coinfection or priority effects to pure  
147 resource or apparent competition. First, if some mechanism imposes self-limitation on both parasites, then  
148 they can coinfect even if they share only one immune niche. For instance, donor-controlled reproduction  
149 can create strong self-limitation on macroparasite density (Fenton & Perkins 2010). Second, non-linearity  
150 in immune clearance rates can generate self-limitation, particularly when clearance accelerates at higher  
151 parasite density (Fenton & Perkins 2010). Third, interference competition between parasites can facilitate  
152 priority effects or coinfection (Amarasekare 2002; Fig. 2A-B with mutually inhibitory effects between  $P_1$   
153 and  $P_2$  [grey shading]). If the inferior energy competitor is superior at interference, priority effects ensue.  
154 Then, at high enough initial densities, the inferior energy competitor can win instead of being excluded.

155 However, if the interference also confers a benefit to the interacting species (e.g., if killing competitor larvae  
156 and consuming it increases per capita growth rate), then coinfection ensues (following Amarasekare 2002).  
157 These general principles for joint interference and exploitative competition (Fig. 2A) likely also apply to  
158 immune-mediated apparent competition, a possibility for future exploration (Fig. 2B).

159

160 *Two parasite – two energy (2P2E; Resource ratio) or Two parasite – two immune cells (2P2I; Immune*  
161 *ratio)*

162 When parasites ( $P_j$ ) simultaneously compete for two resource or energy sources ( $E_i$ ) via exploitative  
163 competition, infection outcomes can include coinfection and priority effects (Tilman 1982). Consider two  
164 parasite species competing for two substitutable resources (like in the resource ratio model: Fig. 2C). Here,  
165 coinfection minimally requires each species to trade off their requirements for each energy resource. Then  
166 sufficiently intermediate supply ratios must permit each single-species ('boundary') equilibria to fall within  
167 each competitors' niches (enabling mutual invasibility). With both conditions met, coinfection arises if each  
168 parasite has larger impact on the resource to which its fitness is most sensitive (see Appendix Section 2).  
169 In testing the resource ratio model, Lacroix *et al.* observed a distinct competitive hierarchy, where one plant  
170 virus altered success of a competing cereal dwarf virus under nitrogen: phosphorus (N:P) supply. In co-  
171 inoculated plants, the cereal dwarf virus infection rates decreased with elevated  $P$  supply rate, while the  
172 addition of N significantly increased its' infection rate (Lacroix *et al* 2014; Smith 2014). This suggests that,  
173 at the very least, N:P shapes how each parasite species differentially impacts their resources, setting the  
174 stage for coinfection.

175 Analogous rules likely apply to hosts with two types of immune response (2P2I, the immune ratio  
176 model; Fig. 2D). If parasites act as substitutable resources for two generalist immune responses, coinfection  
177 arises if each parasite also has larger impact on the immune response to which its' fitness is most sensitive  
178 (Appendix Section 2; derived for case with parasite self-limitation). Modification of this 2P2I framework  
179 captures well-studied within-host interactions. First, the host can mount an independent, specialist immune  
180 response to each parasite (with no links between  $P_i - I_j$ , Fenton & Perkins 2010). Therefore, the separate  
181 dynamics of each immune-parasite pair determines coinfection. Similar results emerge for parasites  
182 separated spatially (e.g., in different host tissues: Cervi *et al* 2004; Karvonen *et al* 2006). Second, two

183 parasites can each be attacked by specialist immune responses that inhibit each other. For instance, in mice,  
184 competing parasites interact *via* T-helper cells, where Th1 attacks intra-cellular malaria, Th2 attacks  
185 intestinal nematodes, but Th1 and Th2 inhibit each other (Griffiths *et al* 2015). Such interference creates  
186 negative feedback that can further enable coinfection (*e.g.*, links between  $I_1$  and  $I_2$  [grey shading]; Fenton  
187 & Perkins 2010).

188

### 189 *Two parasite – immune cell – energy (2PIE)*

190 Parasites can also engage in simultaneous exploitative and immune-mediated apparent competition  
191 (Cressler *et al* 2014; Ramesh & Hall 2023). Consider common variations of two competing parasites ( $P_j$ )  
192 that steal energy ( $E$ ) from hosts and immune cells ( $I$ ) that kill them (2PIE; Fig. 2E-F; Table S1). In one,  
193 only parasites induce production of immune cells (2PIE<sub>i</sub>, induced immunity). In the other, energy is  
194 continuously allocated to maintain baseline immune function, even without parasites (2PIE<sub>c</sub>, constitutive  
195 immunity). This structure resembles a food web in which two prey species share a resource while attacked  
196 by a generalist predator (Holt *et al* 1994; Leibold 1996). This keystone predation (diamond) model  
197 anticipates the tradeoffs and niche dimensions that would govern exploitative and apparent competition  
198 parasites (Ramesh & Hall 2023). When combined, these forms of competition enable coinfection, priority  
199 effects, or competitive exclusion (see below Fig. 3; Ramesh & Hall 2023). Constitutive immunity (Fig. 2F)  
200 reduces opportunities (parameter space) for coinfection, lowering parasite burden while maintaining higher  
201 energy for other metabolic work (see below; Fig. 9).

202 The remainder of this review will focus on joint immune and energy (resource) competition in the 2PIE  
203 model. Most organisms have some type of (costly) immune defences to fight parasites that steal host energy  
204 (*reviewed in* Lochmiller & Deerenberg 2000; Zuk & Stoehr 2002). Furthermore, principles that govern  
205 strength of intra- v inter-specific competition in 2PIE models should apply to others. With the 2PIE model,  
206 then, we ask three questions: (a) What within-host feedback drives divergent outcomes of infection? (b)  
207 How does this framework offer new ways to resolve results in previous coinfection experiments (Fig. 1A-  
208 C)? (c) How can this framework guide future theory and experiments?

209

210



### 211 Section III: A mechanistic framework linking feedbacks, trait ratios, and infection outcomes

212 In this section, we construct a framework for within-host competition of parasites that connects  
213 trade-offs, nullclines (niches), feedbacks, and traits. As we will learn, the 2PIE model follows the familiar  
214 tale of intra- vs inter-specific competition governing coexistence vs priority effects (given a feasible interior  
215 equilibrium; Fig. 1D). Although specifics between 2PIEi and the others (Fig. 2A-F) surely differ, this  
216 approach lays a general script to generate mechanistic *a priori* predictions and glean better understanding  
217 of coinfection dynamics from within-host niche models. Many of the mathematical details are found  
218 elsewhere (Appendix Section 1).

219

#### 220 **The Model (see also S1, Table S1):**

221 *Growth rate of immune cells  $I$*  (Eq. 2A): In 2PIEi, immune cells ( $I$ ) increase after attack on parasite  
222  $j$  ( $P_j$ ) at rate  $f_{IP_j}$ , inducing consumption of  $e_{IP_j}$  of energy,  $E$ , with conversion efficiency  $e_l$  of energy into  
223 an immune cell after debiting loss rate  $m_l$ . In 2PIEc,  $I$  also increases with allocation of  $E$  at baseline rate  
224  $a_b$ .

225 *Growth rate of parasite  $P_j$*  (Eq. 2B): The two parasites consume host energy with feeding rate  
226  $f_{P_j}$  and energy per parasite conversion,  $e_{P_j E}^{-1}$ . The parasites are lost due to attack by immune cells ( $f_{IP_j}$ )  
227 and die at (shared) background rate  $m_p$ .

228 *Growth rate of energy,  $E$*  (Eq. 2C): The host consumes a resource  $S$  via a Monod function with  
229 maximal assimilation rate  $f_E$  and half-saturation constant  $h$ . (This function merely pays homage to non-  
230 linear feeding behaviour of hosts following Cressler *et al* 2014). That resource, converted to energy within  
231 the host ( $E$ ), is lost at fixed rate  $r$  for use by hosts (for metabolic needs). Its net production, then, is  $f(S) - r$   
232  $E$ . Additionally, host energy is consumed via induction from immune attack on parasites (proportional to  
233 the triple product  $P_j E I$ ), and from consumption (theft) by parasites themselves. Hence, parasite  $j$   
234 ‘consumes’ energy both indirect and directly described, a sum grouped below as  $f_j(I)$ . In 2PIEc, energy is  
235 also lost via allocation to baseline immune function at rate  $a_b$ . The 2PIEi,c models are thus:

$$\frac{dI}{dt} = \frac{a_b E + \sum e_{IP_j} f_{IP_j} P_j E I}{e_l} - m_l I, \quad \text{Eq. 2A}$$

$$\frac{dP_j}{dt} = \left( \frac{f_{P_j E}}{e_{P_j E}} - f_{IP_j} I - m_P \right) P_j, \quad \text{Eq. 2B}$$

$$\frac{dE}{dt} = \frac{f_{ES}}{h+S} - rE - (\sum e_{IP_j} f_{IP_j} I + \sum f_{P_j}) P_j E - a_b E. \quad \text{Eq. 2C}$$

236

237 **Outcomes of competition**

238            Depending on their traits, competing parasites can successfully coinfect, singly infect (via  
 239 competitive exclusion or priority effects), or produce no infection in a host. Such outcomes can be captured  
 240 along gradients of, say, supply of resources to hosts,  $S$ , and feeding rate of parasites on energy within hosts,  
 241  $f_{P_1}$  (Fig. 3A, Table S1). The lines within the 2D bifurcation diagram represent qualitative shifts of within-  
 242 host composition determined by minimal requirements. We highlight two such shifts or ‘transcriticals’ ( $T_1$   
 243 and  $T_2$ ) governing coinfection, but we build to it. Very low  $S$  prevents persistence of either parasite, resulting  
 244 in no infection (a nutritional clearance; Fig. 3A, yellow). Increasing  $S$ , now supports only single infection  
 245 by parasite 1 ( $P_1$ ) because it excludes the other via resource competition ( $P_2$ , at  $E-P_1$  [lighter] or  $E-P_1-I$   
 246 [darker] ‘boundary equilibria’). Now, intermediate  $S$ , such that  $T_2 < S < T_1$ , allows parasite 2 ( $P_2$ ) to invade  
 247 that  $P_1$  boundary and  $P_1$  invasion into the  $P_2$ ’s boundary equilibrium ( $E-P_2-I$ ). Hence, that region represents  
 248 mutual invasibility and coinfection (Fig. 3A, orange), situated between regions of competitive exclusion  
 249 (‘single infection’). At higher  $S$ ,  $P_1$  is excluded allowing  $P_2$  to win ( $E-P_2-I$ ; Fig. 3A, dark purple). Notice,  
 250 increasing both  $f_{P_1}$  and  $S$  flips the geometry of those transcriticals. Now, higher  $S$ , such that  $T_1 < S < T_2$ ,  
 251 does not allow  $P_1$  invasion into the  $P_2$ ’s boundary equilibrium and vice-versa. Hence, this region represents  
 252 mutual uninvasibility and priority effects aka founder control (Fig. 3A, grey; see Appendix S1 for details).  
 253 The offsets show sample dynamics when hosts are exposed to concurrent infection, started at one or two  
 254 initial densities, in each of these regions (Fig. 3B – F). In the no infection region, insufficient energy caused  
 255 failed infection, even at high initial densities of parasites (Fig. 3D). In the single infection regions, the  
 256 winner always excludes the other, even with initially low densities (Fig. 3A, E). In the coinfection region,  
 257 all trajectories head toward a stable (interior) equilibrium (Fig. 3C). With priority effects, the parasite  
 258 starting more densely wins and excludes the other (i.e., top:  $P_1$  wins; bottom:  $P_2$  wins; Fig. 3F).

259

260 ***Mechanism of competition: A within-host “assembly rules” and nullcline approach***

261 These predictions hinge on intra- vs inter-specific competition. Intraspecific competition, mediated  
262 indirectly via host energy and immune cells, produces negative feedback loops while interspecific  
263 competition yields positive ones (Fig. 1D). When strength of intra- exceeds inter-specific competition, net  
264 negative feedback on the feasible interior equilibrium can enable coinfection (coexistence). Conversely,  
265 greater inter- than intra-specific competition generates net positive feedback that can produce priority  
266 effects. This section actualizes these concepts for 2PIEi using niches and nullclines.

267 ***Assembly rules:*** Broadly, coinfection requires a competition-resistance trade-off: the species that  
268 competes superiorly for energy (without immune cell) must remain more vulnerable to immune attack. It  
269 also requires intermediate resource supply,  $S$ , as consumed by hosts,  $f(S)$ , falling in between two thresholds  
270 (described below:  $T_2 < f(S) < T_1$ ). The assembly of a within-host ‘community’ of parasites can be understood  
271 via hosts exposed to (i) single species (Fig. 4A, 5A dotted and dashed lines) and (ii) both species (Fig. 4B,  
272 5B solid lines). The single species ‘boundary’ equilibria provide insights into their minimum resource  
273 requirements of parasites for energy ( $E_j^*$ , akin to  $R^*$  sensu Tilman 1982) and of immune cells for the product  
274 of energy and parasites ( $EP_j^*$ ). They also highlight maximal immune cell densities supported by each  
275 parasite ( $I_j^*$ , akin to  $P^*$  sensu Holt 1977). These quantities provide a start for assembly of coinfection.

276 First, the route to single infection follows resource- and immune-based assembly rules along a  
277 nutrient supply gradient,  $S$  (Figs. 4B, 5B). Very low nutrient supply ( $S$ ) meets neither parasite’s minimum  
278 energy requirements ( $E^* < E_j^*$ ). Hence, very low  $S$  prevents infection (i.e., clearance via starvation; yellow).  
279 However, with high enough  $S$ ,  $E^*$  increases, eventually meeting that minimum ( $E_j^*$ ). Then,  $P_j$  can invade  
280 and increase with  $S$  (pinning  $E$  at  $E_j^*$ ;  $E$ - $P_j$  regions in lighter). Eventually,  $P_j$ ’s density crosses a minimal  
281 threshold ( $EP_j^*$ ) that induces immune activation (darker colors). With higher  $S$  still, immune attack reduces  
282 density of  $P_j$  freeing up more energy (where energy with immune cells is denoted by  $E_{j,i}^*$ ). While both  
283 parasite species follow similar assembly rules, they differ in a key trade-off:  $P_1$  is the superior competitor  
284 without immune cells ( $E_1^* < E_2^*$ ) but is more vulnerable to immune attack ( $f_{IP_1} > f_{IP_2}$ ). That competition-  
285 resistance trade-off provides a first prerequisite for coinfection.

286 Comparison of those key energy and immune quantities yields more conditions for coinfection (Fig.  
287 4B). Along the nutrient gradient,  $S$ , the more vulnerable parasite,  $P_1$  invades ( $E$ - $P_1$ ). It outcompetes

288 (excludes) the more resistant parasite,  $P_2$ , via resource competition (since  $E_1^* < E_2^*$ ). At some  $S$  following  
289 immune activation ( $EP_1^*$ ),  $P_1$  becomes the superior apparent competitor ( $I_1^* > I_2^*$ ) but inferior energy  
290 competitor ( $E_{2,I}^* < E_{1,I}^*$ ) – a shift in competitive dominance. Then, with further  $S$  still, the  $E$ - $I$  niche  
291 environment set by  $P_1$  enables  $P_2$  to invade (at  $T_2$ : orange).

292 In a window of coinfection, the within-host niche environment remains constant while parasite  
293 densities shift (Fig. 4B). Here, energy and immune cells stay at  $E_{int}^*$  and  $I_{int}^*$ , respectively. However, with  
294 higher  $S$ , the structure of this community shifts, with  $P_2$  increasing while  $P_1$  declines. With this shift, the  
295 energy and parasite density needed to keep the immune system activated,  $E_{int}^*(P_1^* + P_2^*)$ , increases until  $P_2$   
296 could support immune activation alone (at  $EP_2^*$ ; Fig. 4D). Broadly, in this region, the more vulnerable  $P_1$   
297 remains the superior apparent competitor (Fig. 4D,  $I_1^* > I_2^*$ ) but weaker competitor for energy (Fig. 4C,  $E_2^*$   
298  $< E_{1,I}^*$  shifts to  $E_{2,I}^* < E_{1,I}^*$ ). Conversely, the more resistant  $P_2$  is the superior energy competitor but weaker  
299 apparent competitor. This biology means that the more vulnerable parasite species also produces more  
300 immune cells, the niche factor to which it is most sensitive (see below). That combination imposes a brake  
301 on its own growth rate (negative feedback), thus promoting coinfection. With  $S$  past this threshold ( $T_1$ ),  $P_2$   
302 excludes  $P_1$  (via resource competition:  $E_{2,I}^* < E_{1,I}^*$ ) but more immune cells lower  $P_2$ 's density (purple, Figs.  
303 5B-E).

304 Priority effects can arise with different trait combinations for the two parasites (here: at higher  $f_{P_1}$ ;  
305 Fig. 5B). Along a gradient of nutrient supply to hosts,  $S$ , the region of priority effects is approached similarly  
306 to the coinfection case: first the more vulnerable parasite invades (when its  $E_1^*$  is met), then the immune  
307 system is activated (when its  $EP_1^*$  is reached). However,  $P_1$  always remains the superior energy competitor,  
308 unlike the flip seen before the coinfection window for coinfection (Fig. 5C). Past  $T_1$ , more resistant  $P_2$   
309 cannot invade until  $T_2$  is crossed; with higher  $S$ , more resistant  $P_2$  excludes  $P_1$  via apparent competition  
310 (since  $I_2^* > I_1^*$ ; Fig. 5D). Biologically, this means that the more resistant species produces more immune  
311 cells, the niche factor to which their competitors are most sensitive (see below), creating positive feedback  
312 and thus priority effects. With decreasing  $S$ ,  $P_1$  could not invade until  $T_1$  was crossed. Hence, the interior  
313 equilibrium in the priority effects window is unstable (a saddle), separating two stable states, dominance  
314 by  $P_1$  (at its  $E$ - $P_1$ - $I$  boundary equilibrium) or by  $P_2$  (at  $E$ - $P_2$ - $I$ ).

315 ***A nullcline (niche) interpretation:*** Nullclines help to characterize the niche environment that

316 enables it coinfection. At a given nutrient supply  $S$ , nullclines denote conditions in which a parasite ( $P_j$ ) or  
317 niche component (energy, immune cells) neither grows nor declines. Combinations of energy ( $E$ ) and  
318 immune ( $I$ ) cells that fall to the right of a parasite's nullcline (higher energy, lower immune cells) sit within  
319 its fundamental niche (Fig. 6A;  $P_1$ , blue shading;  $P_2$ , purple). Then, the impact of each parasite on their  
320 within-host niche determines  $I$  and  $E$  nullclines. The nullcline for  $E$  is the combination of  $P_1$  and  $P_2$  that  
321 'consumes' all production of energy at the interior ( $E_{int}^*$ ). Below this line, energy grows ( $dE/dt > 0$ , yellow  
322 in Fig. 6B). The  $P_j$ -axis intercepts ( $\tilde{P}_j$ ) note the density of each parasite, when alone, that consumes all net  
323 energy production. The nullcline for  $I$  is the combination of  $P_1$  and  $P_2$  that meets the minimal  $EP^*$  needed  
324 to maintain its activation. All points above the line increase production of immune cells ( $dI/dt > 0$ ; green  
325 in Fig. 6B). At each intercept ( $\hat{P}_j$ ), the parasite alone supports immune activation (at  $EP_j^*$ ) given  $E_{int}^*$ .

326 *Coinfection* (Fig. 6C - E; black, closed circle): Co-infection requires that parasite nullclines cross,  
327 niche nullclines cross, and nutrient supply is intermediate. The nullclines of the parasites cross in  $E$ - $I$  space  
328 because of their competition-resistance trade-off (Appendix section S1). The shallower slope of less  
329 resistant  $P_1$ 's nullcline means it is more sensitive to  $I$  while more resistant  $P_2$  is more sensitive to  $E$ . When  
330 they coinfect, both parasites set their relevant single-species (boundary) equilibria within the fundamental  
331 niche of the other. Hence, each single-parasite environment can be invaded by the other (Fig. 6C;  $P_1$   
332 equilibrium [blue dot] falls within  $P_2$ 's niche [purple shaded] and vice-versa). Now  $P_1$  is the superior  
333 apparent competitor ( $I_1^* > I_2^*$ ) while  $P_2$  is the superior energy competitor (i.e., has lower  $E^*$ :  $E_{1,I}^* > E_{2,I}^*$   
334 [as shown] or  $E_2^*$ ; Fig. 4C). Meanwhile, the  $I$  nullcline is steeper in  $P_1$ - $P_2$  space (Fig. 6E). Hence  $P_1$  has  
335 larger impact on immune cells while  $P_2$  has larger impact on energy. Therefore, each parasite exerts largest  
336 impact on the niche factor to which it is most sensitive. Based on the nullcline intercepts, coinfection  
337 requires that the interior niche would support surplus  $P_1$  ( $\hat{P}_1 < \tilde{P}_1$ ) but deficient  $P_2$  (so  $\hat{P}_2 > \tilde{P}_2$ ) than needed  
338 to meet immune system's  $EP^*$  requirement (Fig. 6E; when  $f(S) = T_2$ ,  $\hat{P}_1 = \tilde{P}_1$ ; at  $T_1$ ,  $\hat{P}_2 = \tilde{P}_2$ ). The coinfection  
339 equilibrium, then, combines densities of the superior apparent ( $P_1$ ) and energy competitor ( $P_2$ ) that  
340 consumes all net energy production while meeting minimal requirements of immune cells – eliminating  
341 those surpluses and deficits.

342 *Priority effects* (Fig. 6F-H; white, open circle): During priority effects, those three elements change.

343 First, while parasite nullclines still cross (due to the competition-resistance trade-off), now both parasites  
344 ( $P_j$ ) alone create uninhabitable immune ( $I$ ) – energy ( $E$ ) niche environments (Fig. 6F;  $P_1$  blue dot outside  $P_2$   
345 purple shaded niche and vice-versa). Furthermore, in this region  $P_1$  is always the superior energy  
346 competitor, without ( $E_1^* < E_2^*$ ) and with immune cells ( $E_{1,I}^* < E_{2,I}^*$ ), while  $P_2$  becomes the superior  
347 apparent competitor ( $I_2^* > I_1^*$ ; Fig. 6F). Second, the  $E$  nullcline is now steeper than the  $I$  nullcline (Fig. 6J).  
348 Hence, impacts flip: less resistant  $P_1$  has larger impact on  $E$  while more resistant  $P_2$  has larger impact on  $I$ .  
349 Therefore, each parasite has a larger impact on the niche factor to which its competitor is most sensitive.  
350 Thus, the system would provide excess of the more resistant parasite ( $\hat{P}_2 < \tilde{P}_2$ ) and a deficiency of the  
351 vulnerable one ( $\hat{P}_1 > \tilde{P}_1$ ) enabling priority effects.

352

### 353 ***Factors enabling coinfection: Feedback loops and trade-offs of traits***

354 Outcomes of coinfection v priority effects depend on feedback and traits that govern them. At the  
355 most fundamental scale, co-infection must be ‘feasible’ (set by an environment supporting both species) at  
356 an equilibrium having net negative feedback. Such net negative feedback emerges when intraspecific  
357 competition exceeds interspecific competition. That competition depends on loops connecting parasites to  
358 their niche (Fig. 7A, S1). Loops are chains of interactions linking increased density of a species to growth  
359 rates of others, eventually returning to that species (Puccia & Levins 1991). For instance, interspecific  
360 competition can be traced starting with an increase in  $P_1$ . (i) An increase in  $P_1$ ’s density can ‘fuel immune  
361 cells’ that suppress its competitor, freeing up energy resources, thereby increasing its own growth rate via  
362 higher ‘births’. (ii)  $P_1$  can also ‘starve immune cells’ by reducing  $P_2$ ’s density via consumption of  $E$ .  
363 Through both chains of interactions,  $P_1$  indirectly benefits from an increase in its own density via gains in  
364 energy, hence birth rate, or lower death rate, respectively. Those two positive (destabilizing) loops then  
365 push against two negative loops, (iii and iv) “ $P_i$  is attacked,  $P_j$  eats”. These latter loops add the stabilizing,  
366 consumer-resource-like, intraspecific competitive interactions within which each parasite is enmeshed. For  
367 instance, (iii) a small increase in  $P_1$  increases immune attack, thereby reducing  $P_1$  ( $P_1$ - $I$  loop) while  $P_2$  is  
368 slowed by resource consumption ( $P_2$ - $E$  loop). Then, (iv) those roles reverse, *i.e.*, resources brake  $P_1$  while  
369 the immune system slows parasite  $P_2$ . Summed, those two loops (iii and iv) jointly determine the amount

370 of intraspecific competition (negative feedback). Then, the 2PIE model follows the recognizable script of  
371 intra- vs inter-specific competition governing coexistence vs priority effects. If the strength of intraspecific  
372 competition loops (iii + iv: negative) exceeds that of interspecific loops (i + ii: positive), net negative  
373 feedback leads to coinfection. If, instead, interspecific exceed intraspecific loop strength, net positive  
374 feedback generates priority effects.

375 With some rearrangement, these intra- and inter-specific loops governing feedback can more  
376 intimately connect to the niche environment and assembly rules revealed above (Fig. 7B, S1). The first  
377 involves the difference in ratios of sensitivity of each parasite to immune cells,  $I$ , vs. energy,  $E$  (denoted by  
378  $\alpha_j$ ; following Pásztor et al 2016). The second involves the ratio of impacts of each parasite on  $I$  vs.  $E$  ( $\epsilon_j$ ).  
379 Both ratios can be written as proportional to ratios of traits or traits and minimal requirements (Fig. 7D and  
380  $E$ , respectively; see details in Appendix Section S1). Coinfection requires that each parasite has a larger  
381 impact on the niche factor to which it is most sensitive. If the more vulnerable  $P_1$  is most sensitive to and  
382 has highest impact on  $I$ , then  $\alpha_1 > \alpha_2$  and  $\epsilon_1 < \epsilon_2$ . Such symmetry in ratios generates net negative feedback.  
383 For priority effects, the competition-resistance trade-off still yields  $\alpha_1 > \alpha_2$ . However, because  $P_1$  has highest  
384 impact on  $E$  (to which  $P_2$  is most sensitive), the impact ratios flip,  $\epsilon_1 < \epsilon_2$ . This asymmetry in sensitivity vs.  
385 impact ratios produces net positive feedback.

386

#### 387 **Section IV: A focus on the traits and quantities to measure in the future**

388 Presently, most within-host competition experiments observe patterns of coinfection, then infer  
389 mechanisms. The next phase of experimentation should shift toward feedback, minimal requirements, and  
390 traits of mechanistic niche models (like 2PIEi). Above, we learned that coinfection requires that each  
391 parasite has greater impact on the niche factor to which it is most sensitive (generating net negative  
392 feedback); with priority effects, each parasite has greatest impact on the niche factor to which its competitor  
393 is most sensitive (yielding net positive feedback). Future research on coinfection dynamics could aim to  
394 quantify the traits and minima's underlying these sensitivity and impact frameworks.

395 (1) *Quantifying traits*: The (a)symmetry of the *sensitivity-impacts* ratios governing coinfection and  
396 priority effects can be better understood by delineating the combination of traits (Fig. 7D, Appendix Section

397 S1). For instance, the *sensitivity* ratios are governed by killing rate of immune cells on parasites ( $f_{IP_j}$ ),  
398 feeding rate of parasites ( $f_{P_j}$ ), and the cost of producing a new parasite ( $e_{P_jE}$ ). On the other hand, the *impact*  
399 ratios depend on how attacked parasites induce energy allocation to immune cells ( $e_{IP_j}f_{IP_j}$ ) and the per  
400 capita ‘consumption’ of energy by parasite  $j$  directly and indirectly ( $f_{P_j}(I)$ ).

401 (3) *Quantifying key traits and minimal requirements*: Experimental tests of *sensitivity-impact* ratios  
402 could also centre on measurement of key quantities such as the minimal requirement of each parasite ( $E^*$ )  
403 for energy and of the immune system for activation ( $EP^*$ ; Fig. 7E, Table 1C). For instance, the difference  
404 in sensitivity ratios boils down to killing rate of immune cells on parasites,  $f_{P_j}$ , and each parasite’s minimal  
405 energy requirement without immune cells,  $E_j^*$ . Similarly, the difference in impact ratios depend on per capita  
406 ‘consumption’ of energy by parasites,  $f_{P_j}(I)$ , and the immune cells’ minimal energy-parasite requirement  
407  $EP_j^*$  (Appendix S1). These traits and quantities could be estimated via experiments (in principle).

408 Despite this call for a focus on traits and minimal requirements, we acknowledge inherent challenges  
409 in measuring them. To move forward, experimentalists can leverage interdisciplinary methodologies. For  
410 instance, measurement of state variables like parasite ( $P_j^*$ ), energy ( $E_j^*$ ), or immune densities ( $I_j^*$ ) over time  
411 can allow estimation of parameters of the model. Alternatively, traits could be measured with radioisotope  
412 labelling of resources to track parasite feeding rate (Gomez-Amaro *et al* 2015), live imaging to track  
413 immune killing rate (Galli *et al* 2021), ICP-MS to measure energetic content of infected host (Cassat *et al*  
414 2018), etc. As a pay-off, the combination of trait measurements and models generates *a priori* predictions  
415 of infection outcomes and the feedback mechanisms that govern them (notably demonstrated in Budischak  
416 *et al* 2015; Griffiths *et al* 2015). Ultimately, such approaches may catalyse a new wave of theory-grounded,  
417 niche-mechanistic combinations of modelling and experimentation.

418

## 419 **Section V: Explanations for divergent infection outcomes using 2PIE**

420 The model of exploitative and apparent competition between parasites, 2PIE<sub>i,c</sub>, makes predictions  
421 (Fig. 8A, 9) that can help to contextualize and interpret previous experiments (Fig. 8B-F). In this next  
422 section, we envision how 2PIE<sub>i</sub> could produce these various outcomes, backing-out mechanism *post hoc*.  
423 Thus, 2PIE<sub>i</sub> offers a way to potentially resolve otherwise seemingly inconsistent experimental outcomes.



424 Then, it can guide creation of new coinfection models tested in future experiments. Ideally, such efforts  
425 would start with parameterized predictions that test divergence of infection outcomes *a priori*.

426

427 ***Coinfected or not? What within-host factors facilitate or inhibit coinfection? (Fig. 8B, C)***

428 *Priority effects*

429 *Theory:* Stronger inter- than intra-specific competition ensures priority effects (via net positive  
430 feedback) where the parasite with sufficiently high initial dose wins (Fig. 8A, B; Table 1B).

431 *Empirical evidence:* In a rare, unequivocal demonstration of priority effects, the order of arrival of  
432 bacterial (*B. burgdorferi*) strains determined which won and excluded the other within a host mouse (Fig.  
433 8B). Immune response likely did not explain the priority effects (Devevey *et al* 2015), so future work can  
434 pinpoint mechanisms (e.g., resource competition, interference, etc.) facilitating them (Fig. 2B; Table 1B).

435 *Guiding future experiments:* Varying initial parasite dose (dose-dependent assays) provide on  
436 possible way to delineate coinfection vs priority effects. When parasites coinfect, dose does not change  
437 outcome, despite varying initial  $P_2$  and constant initial  $P_1$ . With priority effects, sufficiently high initial  
438 density determines winner (Table 1B). Such an experiment would reveal whether competitive exclusion, or  
439 priority effects led to single infection. Even better, measurement of key quantities involved in *sensitivity-*  
440 *impact* ratios can delineate mechanism (e.g., superior resource  $v$  resistant competitor as in Fig. 5).

441

442 *Competitive exclusion*

443 *Theory:* Differences in parasite traits can separate exclusion from coinfection. For example, for a  
444 given nutrient supply to hosts, a parasite with higher feeding rate (all else equal), can exclude its competitor  
445 resulting in single infection (Fig. 8A, C). In contrast, one with lower feeding rate may successfully coinfect.

446 *Empirical evidence:* Mice infected with malarial strain  $P_1$  or  $P_3$  (blue) were allowed to compete  
447 pairwise against a common malarial strain  $P_2$  (purple; Fig. 8C; De Roode *et al* 2005). In the  $P_3 - P_2$  pairing,  
448 regardless of order or arrival or delay between infections,  $P_3$  competitively excluded  $P_2$  (Fig. 8C).

449 *Guiding future experiments:* Higher competitive ability of  $P_3$  may reflect higher feeding rate on  
450 host energy. In contrast, if strain  $P_1$  had lower feeding rate (hence less competitive), it could stably coinfect  
451 with  $P_2$  (Fig. 8C). Such hypotheses about resource acquisition traits could be tested in the future (Table 1B).

452

453 ***Coinfection hierarchy and community structure (Fig. 8D-F)***

454 *Theory:* When parasites coinfect, nutrient supply to hosts ( $S$ ) can mediate densities of the within-  
455 host energy and immunity, and hence relative and absolute densities of parasites (Fig. 8D). Thus, nutrient  
456 supply can shift this ‘community structure’ of parasites within hosts. For instance, increasing nutrient  
457 supply favours the more resistant  $P_2$  over the less resistant  $P_1$ .

458 *Empirical evidence:* This prediction could explain shifts in community structure of parasites in two  
459 different systems (Fig. 8E). The first arose with mice infected by two species of gastrointestinal worms  
460 (case I; Budischak *et al* 2015); the second used mosquito larvae infected by a microsporidian and protozoan  
461 parasite (case II; Fellous & Koella 2009). Both demonstrate how changing nutrient supply ( $S$ ) favours one  
462 species (purple; positive slope) over the other (blue; negative slope; Fig. 8D). In both cases, relative  
463 abundance of coinfecting species can shift (or not) depending on  $S$ , too. However, future trait measurements  
464 would need to establish that higher  $S$  favoured the more resistant parasite as 2PIE predicts (Table 1C).

465 *Guiding future experiments:* Much may be learned about coinfection and nutrient supply with focus on  
466 individual hosts (*reviewed in* Ezenwa 2021). Hosts can exhibit high intra- and inter-individual variation in  
467 infection outcomes (Merill & Cáceres 2018). To illustrate, parasite densities in the mosquito case ranged  
468 among all individuals from coinfection to single infection via exclusion / priority effects to no infection  
469 (see reference to shaded regions in Fig. 8D v 8F; replotting of Fellous & Koella 2009). Such variation  
470 among hosts could arise from individual differences in resource acquisition. If so, individuals nominally  
471 fed the same amount (in a treatment) may fall functionally along different supply points (like in Fig. 8D).  
472 Individuals consuming less resources would favour the less resistant parasite ( $P_1$ ) while those eating much  
473 more would favour the more resistant one ( $P_2$ ) - yielding exclusion in both cases (Fig. 8D, F). The remaining  
474 hosts became coinfecting, with parasites reaching different densities among hosts. Future, experimental tests  
475 can test for the full range of possible infection outcomes (and hence ‘assembly rules’ leading to coinfection  
476 outcomes) at the individual scale, say, along broader nutrient gradients (Table 1C).

477 Furthermore, niche-based insights can guide more predictive experiments at the within-host scale which  
478 can then be scaled to the population linking within- to between-host dynamics. For instance, fluctuation in  
479 nutrient supply to host could shift competitive outcomes within hosts that then alters multi-parasite

480 outbreaks at the population scale (Hite & Cressler 2018; Ezenwa & Jolles 2011) or ecosystem processes  
481 (Kendig *et al* 2020).

482

### 483 ***Coinfection burden (Fig. 9)***

484 Finally, some hosts present higher coinfection burden (total density) than others, hinting at intrinsic  
485 host resistance via immune clearance. How does variation in immune response govern coinfection burden?

486 *Theory:* In comparison to the model with only immune induction (2PIEi), baseline energy  
487 allocation to immunity squeezes parameter space for coinfection and reduces parasite burden (2PIEc,  
488 constitutive immunity; Fig. 9A-B). Despite the higher allocation (via  $a_b$ ), reduced burden allows the  
489 infected host to maintain more energy for other metabolic work (Fig. 9A-B). At lower nutrient supply ( $S$ ),  
490 ‘no infection’ by parasite shifts from nutritional clearance ( $E$ , yellow; Fig. 9A) to combination of immune  
491 and nutritional form of clearance ( $E-I$ , green; Fig. 9B). The 2PIEc model also predicts that increasing  
492 baseline allocation favours the more resistant  $P_2$  over  $P_1$ , eventually excluding it (Fig. 9E).

493 *Empirical evidence:* Consistent with these predictions, plant hosts treated with immune-signalling  
494 hormone experienced a lower prevalence of a less aggressive parasite, increased burden of infection by a  
495 more aggressive parasite, and experienced fewer co-infections (Halliday *et al* 2018). Thus, hosts with higher  
496 allocation to immunity can resist infection more than those with lower allocation, leading to variation  
497 among hosts in infection burden (all else equal).

498 *Guiding future experiments:* First, one could test such predictions using strains with immune  
499 suppression of specific genes or metabolites involved in constitutive immunity (like in Chen *et al* 2005).  
500 That could shift competition from a 2PIEc framework (with  $a_b > 0$ ) to a more 2PIEi like one (with  $a_b = 0$  at  
501 the extreme). Another test could involve measuring competitive outcomes in host genotypes differing  
502 allocation to baseline immunity (Fuess *et al* 2021; Table 1D).

503

## 504 **Section VI: Conclusion**

505 Why do divergent infection dynamics arise within a host? Competing parasites within a host can  
506 coinfect (coexist), singly infect (through exclusion, or priority effects), or become cleared (no infection;  
507 Fig. 1, 3). Those differing outcomes significantly affect health of individual hosts and even alter population-

508 level disease outbreaks (Mideo *et al* 2008). Such divergent infection outcomes ought to stem from niche  
509 interactions, *i.e.*, with the resources that parasites steal from hosts and the immune cells that kill them  
510 (Cressler *et al* 2014, Graham 2008). Yet, despite two decades of empirical focus on infection dynamics,  
511 many of these studies present a collection of disparate results without a synthetic glue. Clearly then, we  
512 need a comprehensive framework that explains why parasites coinfect and why they might not.

513 Here we build a within-host framework of parasite competition based on ecological theory (Fig. 2).  
514 Using a two parasite – immune cells – energy model (2PIE), we illustrate general principles governing  
515 parasite competition via joint exploitative and immune-mediated apparent competition (Ramesh & Hall  
516 2023). Those forms of competition underlie a within-host framework that connects infection outcomes to  
517 competitive abilities, nullclines (niches), feedbacks, and traits (Figs. 3 – 7; see details in Appendix Section  
518 S1). Notably, we delineate how the interplay of three quantities – minimum resource requirements of (1)  
519 parasites for energy ( $E_j^*$ , akin to  $R^*$ ), and of (2) the product of energy and parasites ( $EP_j^*$ ) for immune cells,  
520 and (3) maximal immune cells supported by each parasite ( $I_j^*$ ) – provide a start for assembly of coinfection.  
521 We show that coinfection requires that each parasite exerts greater impact on its more sensitive niche factor;  
522 that arrangement introduces net stabilizing, negative feedback. With priority effects, each parasite more  
523 strongly impacts the factor to which its competitor is most sensitive, leading to net destabilizing, positive  
524 feedback (Fig. 3, 4).

525 That framework also provides mechanistic insights into and explanations for some experimental  
526 results (Fig. 8-9). First, it explains two ways to hinder coinfection: priority effects can favour early invaders,  
527 while competitive exclusion always inhibits one parasite (arising via *e.g.*, fast feeders at low nutrient supply;  
528 Fig. 5, 8B-C). Second, increasing nutrient supply in the coinfection region can favour the more resistant  
529 over the less resistant parasite, shifting community structure along nutrient gradients (Fig. 8D). Finally,  
530 greater investment in constitutive immunity squeezes opportunity (parameter space) for coinfection and  
531 reduces parasite burden, freeing up energy for metabolic needs (Fig. 9). Together, the 2PIE models provide  
532 interpretation for otherwise puzzling outcomes from various experiments. Although specifics will vary,  
533 these principles should apply other niche models involving, say, two energy or immune sources (Fig. 2,  
534 2P2E, 2P2I; see Appendix Section S2). This synthesis of experiments with models underscores need for  
535 parametrized trait-based experiments that better predict within-host infection outcomes (Table 1).

536           Unpacking such within-host mechanisms can improve our understanding of individual health. For  
537 instance, deworming trials of hosts coinfecting with malaria and gastrointestinal worms show that increased  
538 availability of RBCs allow malaria to proliferate within the host, ultimately making them sicker (Budischak  
539 *et al* 2018). Disentangling the mechanisms can then allow for correct course of treatment plan to improve  
540 individual health (*e.g.*, malarial drugs or vaccines followed by deworming). Together, our work provides a  
541 synthesis of within-host niche-based frameworks, laying a theoretical groundwork for a mechanistic  
542 understanding of competition outcomes. We then used model predictions to contextualize key findings from  
543 the past two decades of experimentation. With this synthesis, we aim to catalyse a new wave of theory-  
544 grounded, niche-mechanistic combinations of modelling and experimentation. Ultimately, such a new wave  
545 could help to mitigate the severity and comorbidities of coinfections but also advance the development of  
546 preventive drug therapeutics and vaccines, ultimately enhancing individual health.

547

548 **Acknowledgements:**

549 AR was supported by the IU Center for the Integrative Study of Animal Behavior, NSF DEB (1655656),  
550 and a MSU Presidential Postdoctoral Fellowship. We thank J Lau and the Klausmeier-Litchman lab for  
551 helpful comments on the manuscript; D Brisson, J de Roode, S Budischak, S Fellous for generously sharing  
552 their data. AR credits J Coltrane and A Ali Khan for artistic inspiration.

553 **FIGURE CAPTIONS**

554 **Figure 1:** *Unpacking causes and consequences of coinfection:* (A-C) Examples from experiments  
555 probing why coinfection arises and the diverse range of its' consequences, including: (A) *Coinfected or*  
556 *not?* What within-host factors facilitate coinfection and what prevents it? Sequential exposure to parasite  
557 species can lead to coinfection irrespective of timing (Case I); in other scenarios, early-infecting parasites  
558 prevailed (impeding coinfection; Case II). (B) *Coinfection community structure:* When they coinfect, why  
559 do some parasites become more abundant than others? When can nutrient supply or resources increase a  
560 parasite's relative abundance (Case I) and both relative and absolute abundance (Case II)? (C) *Coinfection*  
561 *burden:* Finally, some hosts or host genotypes present higher (co)infection burden than others hinting at  
562 differences in immunological resistance. (D) Parasite competition hinges on two main interactions: how (a)  
563 species compete with themselves or intra-specific competition (negative intraspecific direct effect, red  
564 curve), and how (b) species compete interspecifically (negative interspecific direct effect, red arrows).  
565 Generally, coinfection (or within-host coexistence) occurs when intra- exceeds inter-specific competition,  
566 and vice-versa for priority effects, at a feasible 'interior' equilibrium (Table S2). Here, those outcomes are  
567 illustrated with direct effects (in the Lotka-Volterra model). Subsequently, those competitive effects work  
568 indirectly through niche factors (like energy or immune cells).

569 **Figure 2:** *Models of within-host competition of parasites, with potential infection outcomes.* Top  
570 *row, single host energy or immune cells model:* Two parasites can compete indirectly for (A) host energy  
571 (exploitative: 2PE) or (B) via immune cells (apparent competition: 2PI). Parasites can also engage directly  
572 in interference competition (denoted by  $P_1 - P_2$  interactions: grey shading). *Middle row, two energy or*  
573 *immune models:* Two parasites can compete for (C) two sources of energy or other resources within hosts  
574 (2P2E; i.e., like a resource ratio model) or for (D) two different forms of immune cells or classes (2P2I;  
575 'immune ratio'; mutual inhibition between  $I_1 - I_2$  is possible [grey shading]). *Bottom row, energy and*  
576 *immune models:* Competing parasites can be attacked by shared immune cells and compete for host energy  
577 with (E) induced immunity (2PIEi), and (F) with constitutive immunity (2PIEc). Immune cells require host  
578 energy for proliferation resulting in additional  $E-I$  loops beyond those above (B, D). Red (black) arrows:  
579 negative (positive) interspecific direct effects, evaluated at positive densities (a feasible interior  
580 equilibrium); red curved arrow: self-limitation (negative intraspecific effect).

581 **Figure 3:** *Outcomes of within-host competition in the 2PIEi model* (A) Outcomes of competition  
582 are characterized here in a 2D-bifurcation diagram over gradients of nutrient supply point ( $S$ ) and feeding  
583 rate of a parasite,  $P_1$  ( $f_{P_1}$ ). The (a)symmetry in inter- and intra-specific competition involved governs single  
584 infection (via competitive exclusion:  $P_1$  [blue] or  $P_2$  [purple] only), coinfection (orange), priority effects  
585 (gray), or no infection (yellow). (B – F) Sample dynamics for one or two starting densities of  $P_1$  and  $P_2$ .

586 **Figure 4:** *Elements of coinfection (coexistence) in the 2PIEi model.* (A-B) Equilibrial densities  
587 along a gradient of nutrient supply ( $S$ ) of (A) one single parasite,  $P_1$  (blue region, tiny dash, left panel) or  
588 the other,  $P_2$  (purple, large dash, right) or (B) by both parasites (coinfection in orange) for a fixed feeding  
589 rate of  $P_1$  ( $f_{P_1} = 7.2$ ). (C-D) A closer comparison of energy ( $E$ ) and immune ( $I$ ) quantities of each parasite  
590 provides insight into outcomes of joint resource (energy) and apparent competition. (C) *Energy*  
591 *competition:* Without immune attack,  $P_1$  is the superior energy competitor ( $E_1^* < E_2^*$ ) allowing  $P_1$  to win  
592 (*sensu* the  $R^*$  rule). Mortality from immune activation weaken  $P_1$ 's competitive ability, allowing  $P_2$  to  
593 become the superior energy competitor ( $E_{1,I}^* > E_{2,I}^*$ ). (D) *Immune-mediated apparent competition:* Immune  
594 cells proliferate when their minimum energy-parasite requirement is met ( $EP_1^*$ : gray dotted;  $EP_2^*$ : dashed).  
595 The winner of apparent competition (higher  $I_j^*$ ) supports more immune cells (here: less resistant  $P_1$ ). Red  
596 box: Conditions promoting coinfection.

597 **Figure 5:** *Priority effects (founder control) in the 2PIEi model using assembly rules.* (A-B)  
598 Equilibrial densities along a gradient of nutrient supply ( $S$ ) of (A) one parasite,  $P_1$  (blue region, tiny dash,  
599 left panel) or the other  $P_2$  (purple, large dash, right) or (B) leading to priority effects (grey) for a fixed  
600 feeding rate of  $P_1$  ( $f_{P_1} = 10.63$ ). (C-D) Comparison of energy ( $E$ ) and immune ( $I$ ) quantities with each  
601 parasite singly provides insight into competitive outcomes. (C) *Energy competition:* Here,  $P_1$  always  
602 remains the superior energy competitor with ( $E_1^* < E_2^*$ ) or without ( $E_{1,I}^* < E_{2,I}^*$ ) immune cells. (D) *Immune-*  
603 *mediated apparent competition:* Immune cells invade when the minimum energy-parasite requirement of  
604 the immune cells is met ( $EP_1^*$ : gray dotted;  $EP_2^*$ : dashed). In the region of priority effects, more resistant  
605  $P_2$  wins via apparent competition (since  $I_2^* > I_1^*$ ). Grey box: Conditions promoting priority effects.

606 **Figure 6:** *Interpretation of coinfection (coexistence) and priority effects (alternate stable states) in*  
607 *the 2PIEi model using nullclines.* (A) *Sensitivity to their niche:* Densities of energy ( $E$ ) and immune cells

608 ( $I$ ) at which parasites 1 ( $P_1$ ) and 2 ( $P_2$ ) show zero growth ( $dP_j/dt = 0$ ). Combinations below these nullclines  
609 (higher energy, less immune attack) fall in the fundamental niche of each parasite. (B) *Impacts on their*  
610 *niche*: densities of parasite 1 ( $P_1$ ) and 2 ( $P_2$ ) below the energy nullcline ( $dE/dt = 0$ , yellow) or above the  
611 immune ( $dI/dt = 0$ , green) nullcline lead to increases in both. At a given  $S$ , the outcomes of within-host  
612 competition can also be visualized at the intersection of (C,F) parasite or (E,H) energy-immune cell  
613 nullclines involving the (D, G) equilibrium denoting coinfection (black, closed circle: C,D,E) or priority  
614 effects (white, open circle: F,G,H). (See text and Appendix S1, Tables S1,2 for more details).

615 **Figure 7:** *A mechanistic framework for within-host parasite competition, linking feedback, trait*  
616 *ratios and key traits in the 2PIEi model. (A) Feedback:* Coinfection v priority effects is governed by the  
617 sum of level four feedback loops ( $F_4$ ); from *L-R*, two destabilizing, positive (+), interspecific competition  
618 loops and two stabilizing, negative (-), intraspecific competition ones.  $P_i$  benefits from an increase in its  
619 density (positive feedback, interspecific) as it (i) directly “fuels” or (ii) indirectly “starves” immune cells  
620 but is restrained (negative feedback, intraspecific) by (iii) and (iv) “ $P_i$  is attacked,  $P_j$  eats” loops (the product  
621 of binary  $I-P_i$  and  $P_j-E$  consumer-resource-like loops). (B) *Differences in ratios of key traits:* With some  
622 rearrangement, these feedback loops correspond to ratios of key quantities made of key traits. These ratios  
623 encapsulate differences in how competing parasites are (B) *sensitive to* ( $\alpha_1 - \alpha_2$ ) and have (C) *impacts on*  
624 ( $\varepsilon_1 - \varepsilon_2$ ) immune cells and energy. Those differences in ratios can be written proportional to and measured  
625 either as a combination of (D) traits or as (E) traits and minimal requirements. For instance, (E)  $\alpha_j$  is  
626 proportional to the product of killing rate of immune cell on parasite  $j$  ( $f_{IP_j}$ ) and the minimal energy  
627 requirement of parasite  $j$  ( $E_j^*$ ), and  $\varepsilon_j$  is proportional to the per capita ‘consumption’ of energy by parasite  
628  $j$ ,  $f_{IP_j}(I)$ , times minimal energy and parasite needed for immune activation ( $EP_j^*$ ).

629 **Figure 8:** *Coinfected or not?* Assuming a competition-resistance trade-off between competitors, (A)  
630 the 2D bifurcation plot of resource supply to host resources ( $S$ ) and feeding rate of parasite  $P_1$  on host energy  
631 ( $f_{P_1}$ ) captures divergent infection outcomes in 2PIEi (as in Fig. 3): single infection either via priority effects  
632 (grey), or competitive exclusion (blue:  $P_1$  wins; purple:  $P_2$  wins), coinfection (orange), or no infection  
633 (yellow). (B) *Priority effects* in mice parasitized by strains of a bacterium (*B. burgdorferi*), where the first  
634 invader excludes the later. (C) *Competitive exclusion:* A malarial strain ( $P_2$ ; purple) is excluded by one ( $P_3$ )



635 or *coinfects* (coexists) with another strain ( $P_1$ ; blue). (D-F) *Coinfection community structure*: Coinfecting  
636 parasites can shift relative and absolute abundance within hosts with increasing resource supply ( $S$ ). (D)  
637 In 2PIE<sub>i</sub>, increasing nutrient supply favours more resistant  $P_2$  over the superior  $P_1$ . (E) Empirically, shifts  
638 in community structure arise in mice coinfecting by two species of gastrointestinal worms (case I) and a  
639 mosquito larvae infected by a microsporidian (case II). (F) Re-examination of all outcomes of competition  
640 from Case II suggests that variation in infection outcomes could arise when individuals assimilate different  
641 amounts of food. Small deviations among individuals could drive large variation in infection outcomes.

642 **Figure 9: Coinfection burden:** The burden of parasites that infect a host can depend on baseline  
643 energy allocation to immunity ( $a_b$ ). (A) vs. (B): Higher  $a_b$  squeezes parameter space for coinfection (2PIE<sub>i</sub>,  
644 induced v 2PIE<sub>c</sub>, constitutive immunity, respectively). (C-D) It also reduces density of competing parasites.  
645 Reduced burden allows the host to maintain slightly more energy for other metabolic work, potentially  
646 improving host health. (E) Increasing  $a_b$  favours the superior energy competitor (more resistant  $P_2$ ) over  
647 the superior apparent competitor ( $P_1$ ), eventually excluding it. By implication, differences in  $a_b$  can lead to  
648 varying (co)infection burden among hosts.

649 **Table 1. A guide to future coinfection experiments:** The outcomes of within-host competition can  
650 be tested by (A) measuring species' invasion growth rates via phenomenological models (e.g., Lotka-  
651 Volterra), or (B-D) via parameterizing a model mechanistic model like those outlined in Fig. 2 – 7.  
652 'Questions' outline fundamental queries surrounding causes and consequences of divergent infection  
653 outcomes. 'Mechanisms' summarize the theory, and 'Relationships' shows equations or correlations that  
654 can connect theory to experiments. 'Empirical Tests' provides examples of how those relationships can be  
655 tested across a range of systems. Figure created using [BioRender.com](#).

656 **REFERENCES**

657

658 Amarasekare, P. (2002). Interference competition and species coexistence. *Proceedings of the Royal*  
659 *Society of London. Series B: Biological Sciences*, 269(1509), 2541-2550.

660

661 Budischak, S. A., Sakamoto, K., Megow, L. C., Cummings, K. R., Urban Jr, J. F., & Ezenwa, V. O. (2015).  
662 Resource limitation alters the consequences of co-infection for both hosts and parasites. *International*  
663 *Journal for Parasitology*, 45(7), 455-463.

664

665 Budischak, S. A., Wiria, A. E., Hamid, F., Wammes, L. J., Kaiser, M. M., van Lieshout, L., ... & Graham,  
666 A. L. (2018). Competing for blood: the ecology of parasite resource competition in human malaria–  
667 helminth co-infections. *Ecology letters*, 21(4), 536-545.

668

669 Cassat, J. E., Moore, J. L., Wilson, K. J., Stark, Z., Prentice, B. M., Van de Plas, R., ... & Skaar, E. P.  
670 (2018). Integrated molecular imaging reveals tissue heterogeneity driving host-pathogen  
671 interactions. *Science translational medicine*, 10(432), eaan6361.

672

673 Cervi, L., MacDonald, A. S., Kane, C., Dzierszinski, F., & Pearce, E. J. (2004). Cutting edge: dendritic  
674 cells copulsed with microbial and helminth antigens undergo modified maturation, segregate the antigens  
675 to distinct intracellular compartments, and concurrently induce microbe-specific Th1 and helminth-specific  
676 Th2 responses. *The Journal of Immunology*, 172(4), 2016-2020.

677

678 Chen, C. C., Louie, S., McCormick, B., Walker, W. A., & Shi, H. N. (2005). Concurrent infection with an  
679 intestinal helminth parasite impairs host resistance to enteric *Citrobacter rodentium* and enhances  
680 *Citrobacter*-induced colitis in mice. *Infection and immunity*, 73(9), 5468-5481.

681

682 Clay, P. A., Cortez, M. H., Duffy, M. A., & Rudolf, V. H. (2019). Priority effects within coinfecting hosts  
683 can drive unexpected population-scale patterns of parasite prevalence. *Oikos*, 128(4), 571-583.

684

685 Cressler, C. E., Nelson, W. A., Day, T., & McCauley, E. (2014). Disentangling the interaction among host  
686 resources, the immune system and pathogens. *Ecology letters*, *17*(3), 284-293.

687

688 De Roode, J. C., Helinski, M. E., Anwar, M. A., & Read, A. F. (2005). Dynamics of multiple infection and  
689 within-host competition in genetically diverse malaria infections. *The American Naturalist*, *166*(5), 531-  
690 542.

691

692 Devevey, G., Dang, T., Graves, C. J., Murray, S., & Brisson, D. (2015). First arrived takes all: inhibitory  
693 priority effects dominate competition between co-infecting *Borrelia burgdorferi* strains. *BMC*  
694 *microbiology*, *15*(1), 61.

695

696 Ezeamama, A. E., Friedman, J. F., Olveda, R. M., Acosta, L. P., Kurtis, J. D., Mor, V., & McGarvey, S. T.  
697 (2005). Functional significance of low-intensity polyparasite helminth infections in anemia. *The Journal of*  
698 *infectious diseases*, *192*(12), 2160-2170.

699

700 Ezenwa, V. O. (2021). Co-infection and nutrition: integrating ecological and epidemiological perspectives.  
701 In *Nutrition and Infectious Diseases* (pp. 411-428). Humana, Cham.

702

703 Ezenwa, V. O., Etienne, R. S., Luikart, G., Beja-Pereira, A., & Jolles, A. E. (2010). Hidden consequences  
704 of living in a wormy world: nematode-induced immune suppression facilitates tuberculosis invasion in  
705 African buffalo. *The American Naturalist*, *176*(5), 613-624.

706

707 Ezenwa, V. O., & Jolles, A. E. (2011). From host immunity to pathogen invasion: the effects of helminth  
708 coinfection on the dynamics of microparasites. *Integrative and comparative biology*, *51*(4), 540-551.

709

710 Fellous, S., & Koella, J. C. (2009). Infectious dose affects the outcome of the within-host competition  
711 between parasites. *The American Naturalist*, *173*(6), E177-E184.

- 712
- 713 Fenton, A., & Perkins, S. E. (2010). Applying predator-prey theory to modelling immune-mediated, within-  
714 host interspecific parasite interactions. *Parasitology*, *137*(6), 1027-1038.
- 715
- 716 Freckleton, R. P., & Watkinson, A. R. (2000). Designs for greenhouse studies of interactions between  
717 plants: an analytical perspective. *Journal of Ecology*, *88*(3), 386-391.
- 718
- 719 Fuess, L. E., Weber, J. N., den Haan, S., Steinel, N. C., Shim, K. C., & Bolnick, D. I. (2021). Between-  
720 population differences in constitutive and infection-induced gene expression in threespine  
721 stickleback. *Molecular Ecology*, *30*(24), 6791-6805.
- 722
- 723 Galli, F., Varani, M., Lauri, C., Silveri, G. G., Onofrio, L., & Signore, A. (2021). Immune cell labelling and  
724 tracking: implications for adoptive cell transfer therapies. *EJNMMI radiopharmacy and chemistry*, *6*, 1-19.
- 725
- 726 Graham, A. L. (2008). Ecological rules governing helminth–microparasite coinfection. *Proceedings of the*  
727 *National Academy of Sciences*, *105*(2), 566-570.
- 728
- 729 Griffiths, E. C., Pedersen, A. B., Fenton, A., & Petchey, O. L. (2011). The nature and consequences of  
730 coinfection in humans. *Journal of Infection*, *63*(3), 200-206.
- 731
- 732 Griffiths, E. C., Fairlie-Clarke, K., Allen, J. E., Metcalf, C. J. E., & Graham, A. L. (2015). Bottom-up  
733 regulation of malaria population dynamics in mice co-infected with lung-migratory nematodes. *Ecology*  
734 *letters*, *18*(12), 1387-1396.
- 735
- 736 Grainger, T. N., Levine, J. M., & Gilbert, B. (2019). The invasion criterion: a common currency for  
737 ecological research. *Trends in ecology & evolution*, *34*(10), 925-935.
- 738
- 739 Gruner, D. S., Kolekar, A., McLaughlin, J. P., & Strong, D. R. (2009). Host resistance reverses the outcome

- 740 of competition between microparasites. *Ecology*, 90(7), 1721-1728.
- 741
- 742 Guzmán-Franco, A. W., Clark, S. J., Alderson, P. G., & Pell, J. K. (2009). Competition and co-existence of  
743 *Zoophthora radicans* and *Pandora blunckii*, two co-occurring fungal pathogens of the diamondback moth,  
744 *Plutella xylostella*. *Mycological research*, 113(11), 1312-1321.
- 745
- 746 Halliday, F. W., Umbanhowar, J., & Mitchell, C. E. (2018). A host immune hormone modifies parasite  
747 species interactions and epidemics: insights from a field manipulation. *Proceedings of the Royal Society*  
748 *B*, 285(1890), 20182075.
- 749
- 750 Halliday, F. W., Penczykowski, R. M., Barrès, B., Eck, J. L., Numminen, E., & Laine, A. L. (2020).  
751 Facilitative priority effects drive parasite assembly under coinfection. *Nature Ecology & Evolution*, 4(11),  
752 1510-1521.
- 753
- 754 Hart, S. P., Freckleton, R. P., & Levine, J. M. (2018). How to quantify competitive ability. *Journal of*  
755 *Ecology*, 106(5), 1902-1909.
- 756
- 757 Hite, J. L., & Cressler, C. E. (2018). Resource-driven changes to host population stability alter the evolution  
758 of virulence and transmission. *Philosophical Transactions of the Royal Society B: Biological*  
759 *Sciences*, 373(1745), 20170087.
- 760
- 761 Holt, R. D., Grover, J., & Tilman, D. (1994). Simple rules for interspecific dominance in systems with  
762 exploitative and apparent competition. *The American Naturalist*, 144(5), 741-771.
- 763
- 764 Holt, R. D. (1977). Predation, apparent competition, and the structure of prey communities. *Theoretical*  
765 *population biology*, 12(2), 197-229.
- 766
- 767 Karvonen, A., Jokela, J., & Laine, A. L. (2019). Importance of sequence and timing in parasite

- 768 coinfections. *Trends in parasitology*, 35(2), 109-118.
- 769
- 770 Karvonen, A., Savolainen, M., Seppälä, O., & Valtonen, E. T. (2006). Dynamics of *Diplostomum*
- 771 *spathaceum* infection in snail hosts at a fish farm. *Parasitology Research*, 99(4), 341-345.
- 772
- 773 Kendig, A. E., Borer, E. T., Boak, E. N., Picard, T. C., & Seabloom, E. W. (2020). Host nutrition mediates
- 774 interactions between plant viruses, altering transmission and predicted disease spread. *Ecology*, 101(11),
- 775 e03155.
- 776
- 777 Lacroix, C., Seabloom, E. W., & Borer, E. T. (2014). Environmental nutrient supply alters prevalence and
- 778 weakens competitive interactions among coinfecting viruses. *New Phytologist*, 204(2), 424-433.
- 779
- 780 Merrill, T. E. S., & Cáceres, C. E. (2018). Within-host complexity of a plankton-parasite
- 781 interaction. *Ecology*, 99(12), 2864-2867.
- 782
- 783 Leibold, M. A. (1996). A graphical model of keystone predators in food webs: trophic regulation of
- 784 abundance, incidence, and diversity patterns in communities. *The American Naturalist*, 147(5), 784-812.
- 785
- 786 Lively, C. M., de Roode, J. C., Duffy, M. A., Graham, A. L., & Koskella, B. (2014). Interesting open
- 787 questions in disease ecology and evolution. *The American Naturalist*, 184(S1), S1-S8.
- 788
- 789 Lochmiller, R. L., & Deerenberg, C. (2000). Trade-offs in evolutionary immunology: just what is the cost
- 790 of immunity?. *Oikos*, 88(1), 87-98.
- 791
- 792 Lotka, A. J. (1925). *Elements of physical biology*. Williams & Wilkins.
- 793
- 794 Mideo, N., Alizon, S., & Day, T. (2008). Linking within-and between-host dynamics in the evolutionary
- 795 epidemiology of infectious diseases. *Trends in ecology & evolution*, 23(9), 511-517.

796

797 Moret, Y., & Schmid-Hempel, P. (2000). Survival for immunity: the price of immune system activation for  
798 bumblebee workers. *Science*, 290(5494), 1166-1168.

799

800 Pásztor, L., Botta-Dukát, Z., Magyar, G., Czárán, T., & Meszéna, G. (2016). *Theory-based ecology: a*  
801 *Darwinian approach*. Oxford University Press.

802

803 Puccia, C. J., & Levins, R. (1991). Qualitative modeling in ecology: loop analysis, signed digraphs, and  
804 time averaging. In *Qualitative simulation modeling and analysis* (pp. 119-143). New York, NY: Springer  
805 New York.

806

807 Råberg, L., De Roode, J. C., Bell, A. S., Stamou, P., Gray, D., & Read, A. F. (2006). The role of immune-  
808 mediated apparent competition in genetically diverse malaria infections. *The American Naturalist*, 168(1),  
809 41-53.

810

811 Ramesh, A., & Hall, S. R. (2023). Niche theory for within-host parasite dynamics: Analogies to food web  
812 modules via feedback loops. *Ecology Letters*, 26(3), 351-368.

813

814 Restif, O., & Graham, A. L. (2015). Within-host dynamics of infection: from ecological insights to  
815 evolutionary predictions. *Philosophical Transactions of the Royal Society B: Biological*  
816 *Sciences*, 370(1675), 20140304.

817

818

819 Smith, V. H. (2014). Nutrient supply differentially alters the dynamics of co-infecting phytoviruses. *New*  
820 *Phytologist*, 204(2), 265-267.

821

822 Susi, H., Barres, B., Vale, P. F., & Laine, A. L. (2015). Co-infection alters population dynamics of  
823 infectious disease. *Nat Commun* 6: 5975.

- 824
- 825 Tilman, D. (1982). *Resource competition and community structure* (No. 17). Princeton university press.
- 826
- 827 Tombak, K. J., Budischak, S. A., Hauck, S., Martinez, L. A., & Rubenstein, D. I. (2020). The non-invasive  
828 measurement of faecal immunoglobulin in African equids. *International Journal for Parasitology:  
829 Parasites and Wildlife*, 12, 105-112.
- 830
- 831 Vogels, C. B., Rückert, C., Cavany, S. M., Perkins, T. A., Ebel, G. D., & Grubaugh, N. D. (2019). Arbovirus  
832 coinfection and co-transmission: A neglected public health concern?. *PLoS biology*, 17(1), e3000130.
- 833
- 834 Volterra, V. (1926). Fluctuations in the abundance of a species considered  
835 mathematically. *Nature*, 118(2972), 558-560.
- 836
- 837 Zuk, M., & Stoehr, A. M. (2002). Immune defense and host life history. *The American Naturalist*, 160(S4),  
838 S9-S22.



**A. COINFECTED OR NOT?**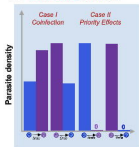

What within-host factors favour or undermine coinfection?  
e.g., Timing of infection results in coinfection, single infection (via priority effects/ exclusion), or clearance

Clay 2019; Devevey 2015

**B. COMMUNITY STRUCTURE**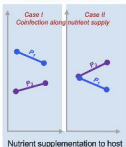

During coinfection, why may one parasite become more abundant?  
e.g., Nutrient supply or resources can shift this 'community structure' of parasites within hosts.

Budischak 2015; Fellous & Koelle 2009

**C. COINFECTION BURDEN**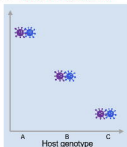

Why do some hosts present higher burden of coinfecting parasites?  
e.g., Variation in immune response leads to varied infection burden in hosts

Fuoss 2021

**D.****GENERAL THEORY OF COINFECTION**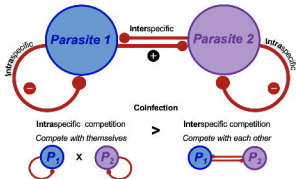

## Within-host models of parasite competition

2 Parasite – host  
energy - 2PE

**Exploitative competition**

**A.**

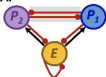

2 Parasite – host  
immune cells - 2PI

**Apparent competition**

**B.**

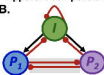

Parasite competition along a single niche dimension, i.e., (A) energy-mediated exploitative competition (2PE), or (B) immune-mediated apparent competition (2PI), ensures exclusion when parasites grow exponentially. Adding direct interference competition (grey box) enables coinfection and priority effects.

2 Parasite –  
2 host energy

**2P2E Resource Ratio**

**C.**

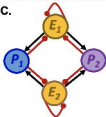

2 Parasite –  
2 immune cells

**2P2I Immune Ratio**

**D.**

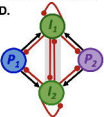

(C) Exploitation of two energy resources (2P2E) in resource ratio competition, or (D) apparent competition for two types of immune cells, i.e., 'immune ratio' (2P2I), enables coinfection and priority effects. Production of immune cells can interfere with each other (grey box).

2 Parasite – immune cells – host energy

**2PIEi**

**Induced immunity**

**E.**

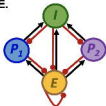

**2PIEc**

**Constitutive immunity**

**F.**

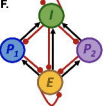

Exploitative and immune-mediated apparent competition enables coinfection and priority effects (2PIE).

(E) Compared to hosts with solely induced immunity (2PIEi), (F) constitutive immunity (via fixed energy allocation; 2PIEc) reduces opportunities for coinfection and parasite burden (see text).

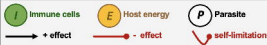

# Outcomes of within-host parasite competition

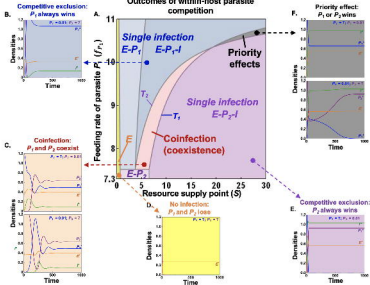

**A. Host infected by single parasite or**

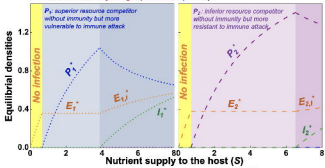

**B. Host infected by both parasite species**

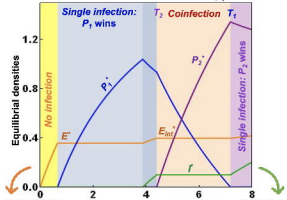

**C. Host energy ( $E$ )**

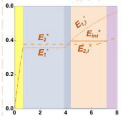

Superior energy competitor,  $P_1$  with no immune cell (lowest  $E_1^*$ ) becomes...

**Condition / criterion**

Coinfection occurs between Superior resource competitor Superior apparent competitor At lower  $S$ ,  $P_1$  wins via At higher  $S$ ,  $P_2$  wins via Switch in competitive rankings? Stronger form of competition

**Coinfection region**

$T_2 < S < T_1$   
 $P_2$   
( $E_2^* < E_{int}^* ; E_2^* < E_{int}^*$ )  
 $P_1$   
( $I_1^* > I_1^*$ )  
apparent competition (higher  $I^*$ )  
resource competition (lower  $E^*$ )  
yes  
intra- > inter-specific competition

Coinfection requires that each parasite has a larger impact on the niche factor to which it is most sensitive

**D. Immune cells ( $I$ )**

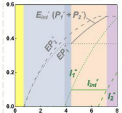

...superior apparent competitor (highest  $I_1^*$ ) when its  $EP_1^*$  is met

**A. Host infected by single parasite** 

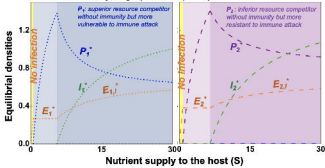

**B. Host infected by both parasite species** 

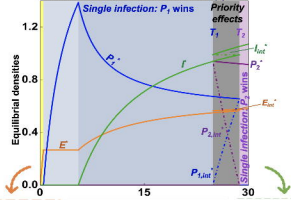

**C. Host energy density ( $E$ )**

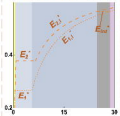

$P_1$  remains the superior energy competitor without or with immune cells ...

**Condition / criterion**

- Priority effects occur between
- Superior resource competitor
- Superior apparent competitor
- At lower  $S$ ,  $P_1$  wins via
- At higher  $S$ ,  $P_2$  wins via
- Switch is competitive rankings?
- Stronger form of competition

**Priority effects region**

- $T_1 < S < T_2$
- $P_1$
- ( $E_{1j}^* < E_{2j}^*$ )
- $P_2$
- ( $I_1^* > I_2^*$ )
- resource competition (lower  $E$ )
- apparent competition (higher  $I^*$ )
- no
- intra- > intra-specific

Priority effect requires each parasite has greatest impact on the niche to which its competitor is most sensitive

**D. Immune cells density ( $I$ )**

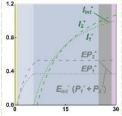

...but becomes inferior apparent competitor with immune cell (lower  $I$ )

**A. Sensitivity of parasites to host niche**

**B. Impacts of parasites on host niche**

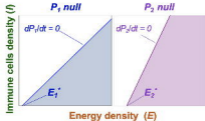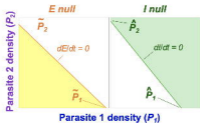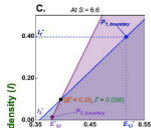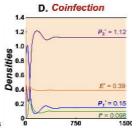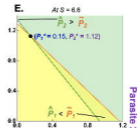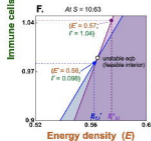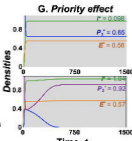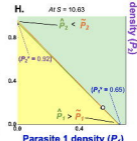

## FEEDBACK

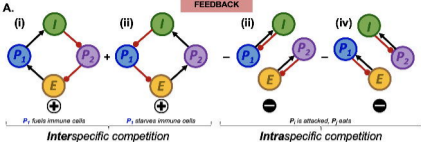

## DIFFERENCES IN KEY RATIOS

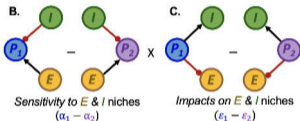

## KEY TRAITS

### D. Differences in key ratios written as proportional to traits only

$$\left( \frac{e_{P_1 E} f_{IP_1}}{f_{P_1}} - \frac{e_{P_2 E} f_{IP_2}}{f_{P_2}} \right) \times \left( \frac{e_{IP_1} f_{IP_1}}{f_{P_1} (I_{int}^*)} - \frac{e_{IP_2} f_{IP_2}}{f_{P_2} (I_{int}^*)} \right)$$

Killing rate, immune cell on parasite  
 Cost of producing parasite  $I$   
 Parasite feeding rate  
 Induced energy allocation per parasite killed by the immune response  
 Immune cells supported  
 Killing rate, immune cell on parasite  
 per capita 'consumption' of energy by parasite  
 $f_{P_j} (I_{int}^*) = f_{P_j} - e_{IP_j} f_{IP_j} I_{int}^*$

### E. Differences in key ratios written as proportional to traits and minimal requirements

$$\left( f_{IP_1} E_1^* - f_{IP_2} E_2^* \right) \times \left( f_{P_1} (I) EP_{1,I}^* - f_{P_2} (I) EP_{2,I}^* \right)$$

$E_j^*$  minimal requirement without immunity

$$E_j^* = \frac{e_{P_j I} m_{IP}}{f_{P_j}}$$

Parasite background mortality rate

$EP_{L,I}^*$  minimal EP requirement for the immune system

$$EP_{L,I}^* = \frac{e_I m_I}{e_{IP_j} f_{IP_j}}$$

Immune cells background mortality rate

**Priority effects in sequential infection experiments**

**B.**

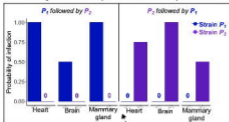

**Empirical pattern:**

First arriving strain of bacteria (*B. burgdorferi*) wins competition in mice, excluding the late arriver.

**Consistent explanation:** 2PIE predicts that parasite with highest initial density can win in priority effects region (adapted from Devevey et al 2015).

**A.**

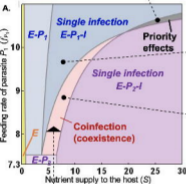

**C. Single infection**

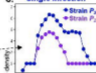

**Empirical pattern:**

In competition, one genetically distinct malarial strain ( $P_2$ ) becomes excluded (by  $P_3$ ) or coinfects (with  $P_1$ ).

**Consistent explanation:** Exclusion of  $P_2$  is consistent with winner ( $P_3$ ) having higher feeding rate.

Coexistence is consistent with  $P_2$  having lower feeding rate (adapted from de Roode et al 2005).

**Coinfection**

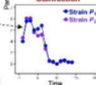

**Coinfection along resource supply**

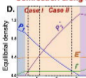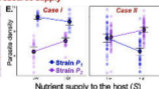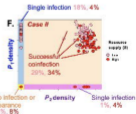

**Empirical pattern:** (E) Nutrient supply ( $S$ ) can shift 'community structure' of parasites within hosts

**Consistent explanation:** (D) 2PIE predicts shifts in relative and absolute abundance towards more resistant parasite ( $P_2$ ) with higher  $S$  in successful coinfections. (F) Replot of Case II for all hosts exposed to both parasites, captures divergent outcomes: no infection or clearance, ' $P_1$  single infection' likely at low supply (18%), ' $P_2$  single infection' likely at high supply (4%), coinfection where parasite densities of species are negatively correlated across nutrient supply as predicted by (D) model. (Replotting of Case I: Budischak et al 2015, Case II: Fellous & Koella 2009)



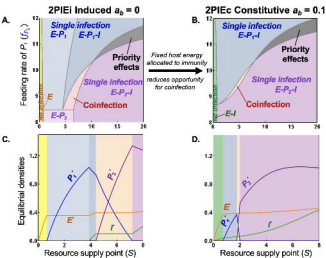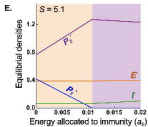

Table 1

## Question

## Mechanism

## Relationship

## Empirical Tests

## A. When can competing parasites coexist?

In general, successful coinfection occurs when intra is greater than interspecific competition captured by simple phenomenological models like Lotka-Volterra competition

$$\frac{dP_i}{dt} = r_i(1 - a_{ii}P_i - a_{ij}P_j)$$

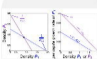

A response surface design can evaluate growth rates estimated by intra- and inter-specific competition coefficients

- Using a response surface design, infect a host with an individual parasite grown
  - alone; with a range of
  - conspecific competitor densities, and
  - interspecific competitor densities
- Measure per capita rate of parasite increase (e.g., macroparasites that multiply within hosts)
- Calculate intrinsic population growth rate ( $r_i$ ) and the intraspecific ( $a_{ii}$ ) and interspecific ( $a_{ij}$ ) coefficients
- Quantify growth rates and validate results with models fit to time series data within-hosts (e.g., LV, Beverton-Holt model); see: Gruner 2009, Grainger 2019

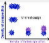

## B. What hinders coinfection?

## ↳ Priority effects

## ↳ Competitive exclusion

If the less resistant parasite always competes for energy (without or without immune cells) while the resistant parasite is best apparent competitor (highest  $r_i$ ), then they can exhibit **priority effects**

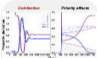

When parasites **coinfect**, dose does not change final outcome, despite varying initial  $P_1$  and constant initial  $P_2$ . With **priority effects**, sufficiently high initial density determines winner.

- ↳ **Testing priority effects:** 1) Set up a dose-dependent infection assay where dose of one parasite is varied keeping the other constant with single infection controls. 2) Measure parasite densities over time and/or immune cells and nutritional status to delineate mechanism (e.g., superior resource v resistant competitor as in Fig. 4).

- ↳ **Testing competitive exclusion:** 1) The above experiment can also yield exclusion. 2) Alternately, exclusion can be traced by varying quantifiable traits that govern competitive ability, e.g., foraging rates of parasites. 3) Measure pairwise competition of two or more parasite strains with different feeding rates over time (Fig 7C).

## C. How does nutrient enrichment mediate community structure?

Nutrient supply to hosts mediates densities of within-host energy and immunity, and hence relative and absolute densities of parasites. Increasing nutrient supply favours the resistant but superior energy competitor ( $P_2$ ) over the less resistant but superior apparent competitor ( $P_1$ ).

## Outcomes of within-host competition

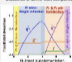

Nutrient supply can shift 'community structure' of parasites within hosts from **no infection** →  $P_1$  wins → **coinfection** →  $P_2$  wins

- Raise hosts that are i) singly infected, and ii) coinfectd along a nutrient supplement gradient (e.g., food enriched with nitrogen, iron, etc.).
- Measure probability of infection outcomes (Fig. 8C), and/or parasite densities, immune cells and nutritional status over time (Budechak 2015).
- With single infection data measure minimum resource requirements of parasites and immune cells that establish the energy-immune trade-off (Fig. 4D-E) between competing parasites ( $R^*$  rule).
- Alternately, field observations could correlate parasite densities to host resource or immune measurements to infer mechanism; see: Tombak 2021, Ezenwa 2010

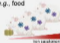

## D. How does constitutive immunity hinder co-infection?

Larger baseline allocation of energy to immunity ( $a_i$ ) → higher immune response. Higher immune response reduces parasite burden ( $P_1 + P_2$ ) that allows the host to maintain slightly higher energy ( $E$ ) for other metabolic work.

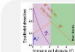

Greater immune cell density (due to  $a_i$ ) → ↓ opportunity for coinfection → ↓ and excludes resistant  $P_2$  freeing up energy for metabolic needs. Investment in immunity without compensatory intake leads to host death.

**Effect of constitutive immunity on burden:** Expose hosts with differences in constitutive immunity, i.e., differences in immune resistance, to multiple parasite strains. Hosts should have a higher probability of coinfections v single infections with no / low constitutive immunity.

**Cost of immune maintenance:** Expose hosts to inactivated parasites or stimulate immune system (e.g., LPS beads) under starvation. Lack of compensatory nutritional intake can affect host survival, condition and reproduction. Differences between control and infected can estimate cost of immune maintenance; see: Moret & Schmid-Hempel 2000

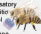

Source: https://medrxiv.org/content/10.1101/2024.06.28.24309686v1.full.pdf
